# Supplementary material for: Practical identifiability analysis of a mechanistic model for the time to distant metastatic relapse and its application to renal cell carcinoma
Source: PubMed Central journal article supplement (PMC9451098; doi:10.1371/journal.pcbi.1010444), 2022-08-25
Supplement: pcbi.1010444.s002.pdf [file pcbi.1010444.s002.pdf]

## S2 Fig: Discrete Covariate

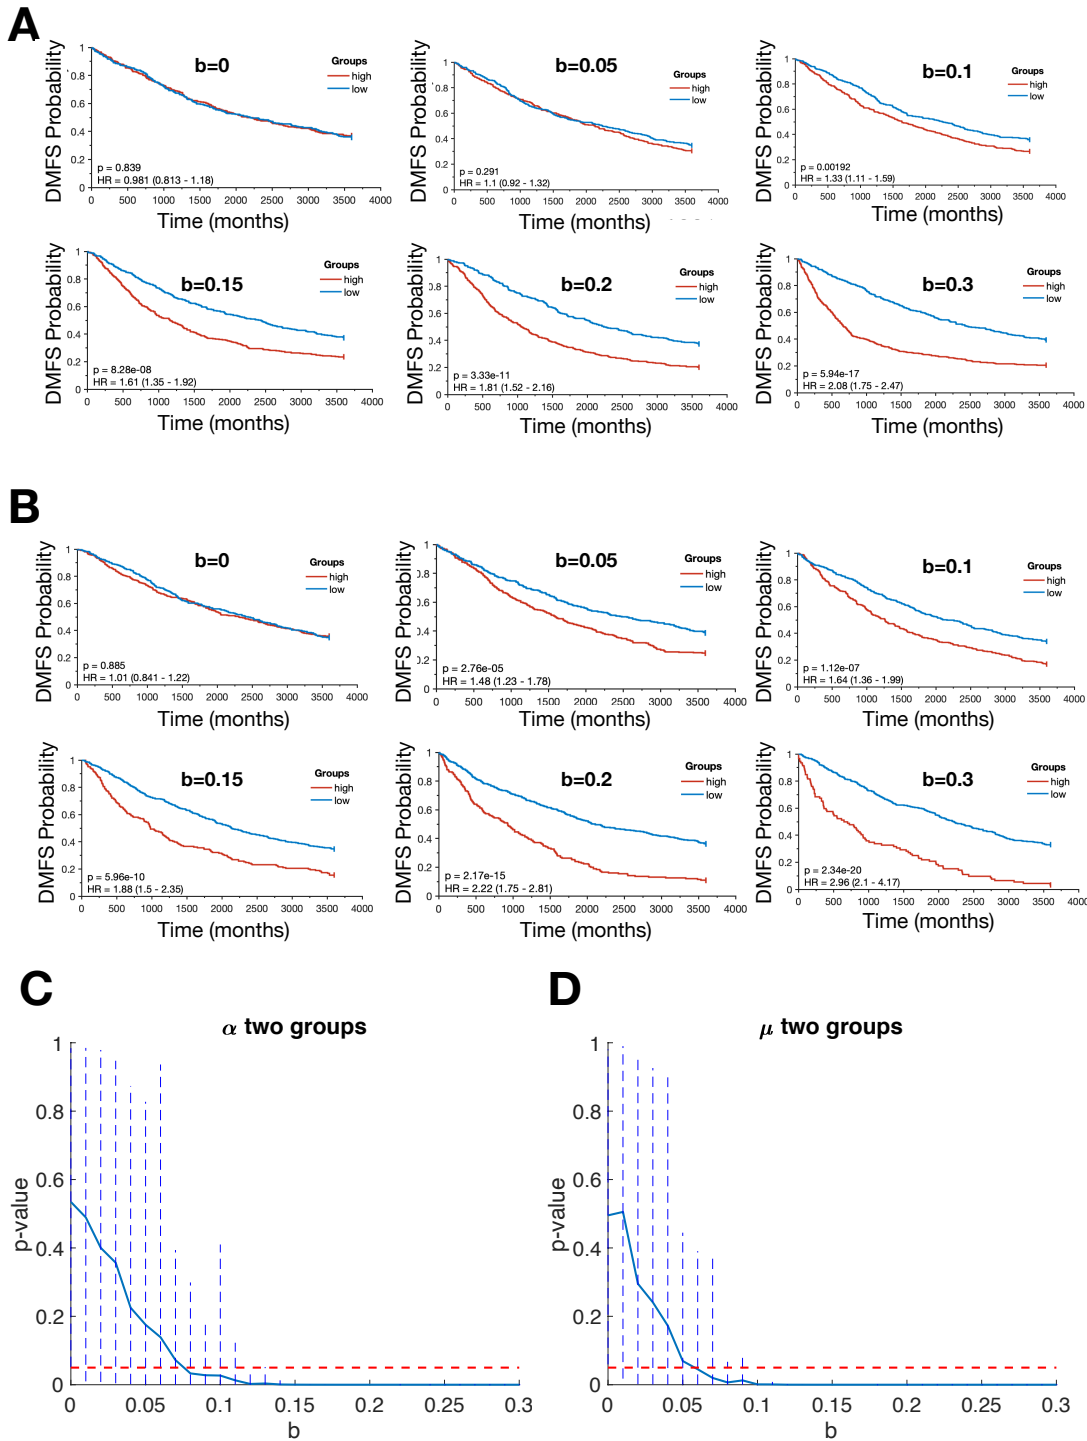

Survival curves between groups with different levels values of  $b$ : A) Effect in  $\alpha$ , B) effect in  $\mu$ .

C-D) Solid line represents the mean p-value of log-rank test with different values of  $b$ . Dashed blue lines represents the 95% CI. Red dashed line represents the statistical significance level  $p = 0.05$ . Simulations were repeated 100 times. C) Effect in  $\alpha$  D) Effect in  $\mu$
