# Supplementary material for: Practical identifiability analysis of a mechanistic model for the time to distant metastatic relapse and its application to renal cell carcinoma
Source: PubMed Central journal article supplement (PMC9451098; doi:10.1371/journal.pcbi.1010444), 2022-08-25
Supplement: pcbi.1010444.s003.pdf [file pcbi.1010444.s003.pdf]

### S3 Fig: Different effects in a continuous variable

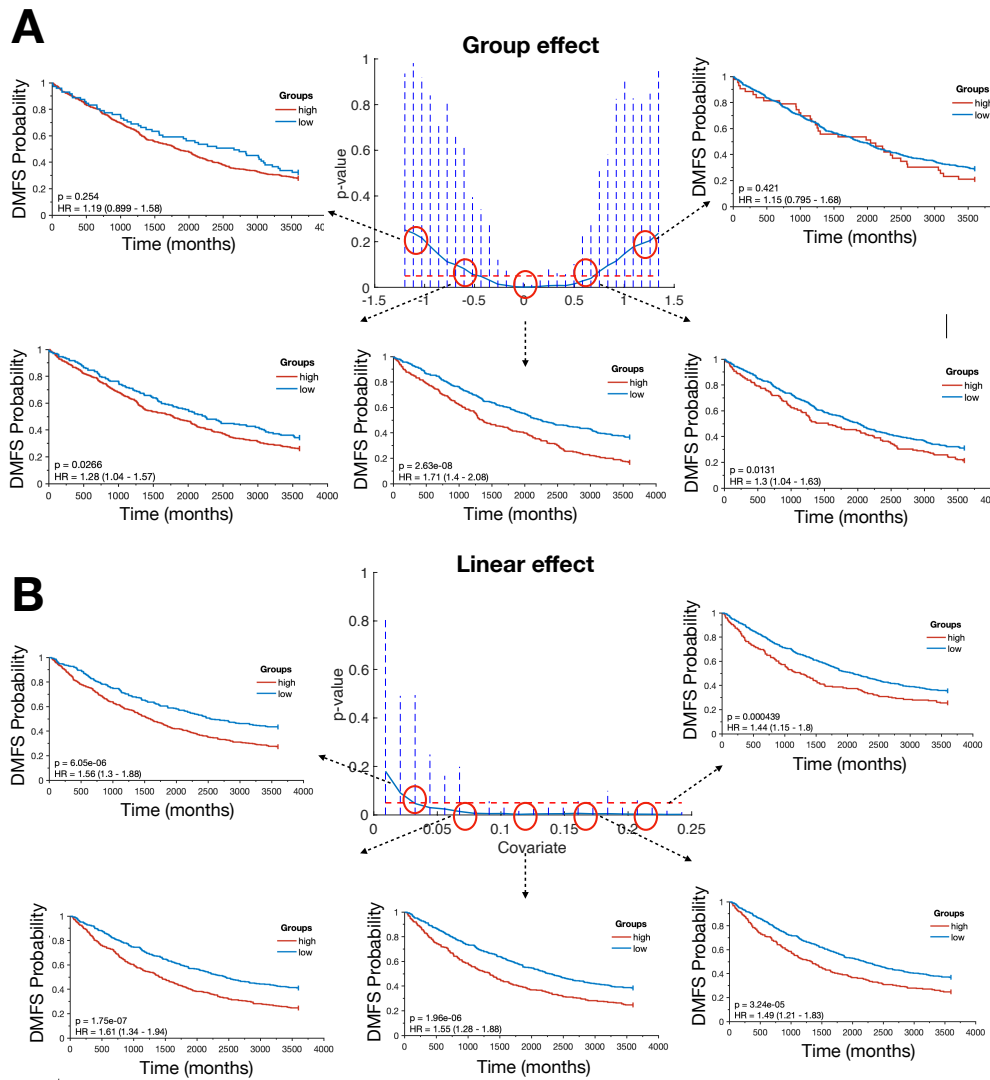

Synthetic DMFS curves at different thresholds simulated with an effect in the variable  $\alpha$ . P-values at different thresholds are displayed in the center figure. A) Group effect B) Linear effect
