# Supplementary material for: Practical identifiability analysis of a mechanistic model for the time to distant metastatic relapse and its application to renal cell carcinoma
Source: PubMed Central journal article supplement (PMC9451098; doi:10.1371/journal.pcbi.1010444), 2022-08-25
Supplement: pcbi.1010444.s004.pdf [file pcbi.1010444.s004.pdf]

## S4 Fig: Identification of the right effect with a continuous covariate

**A**

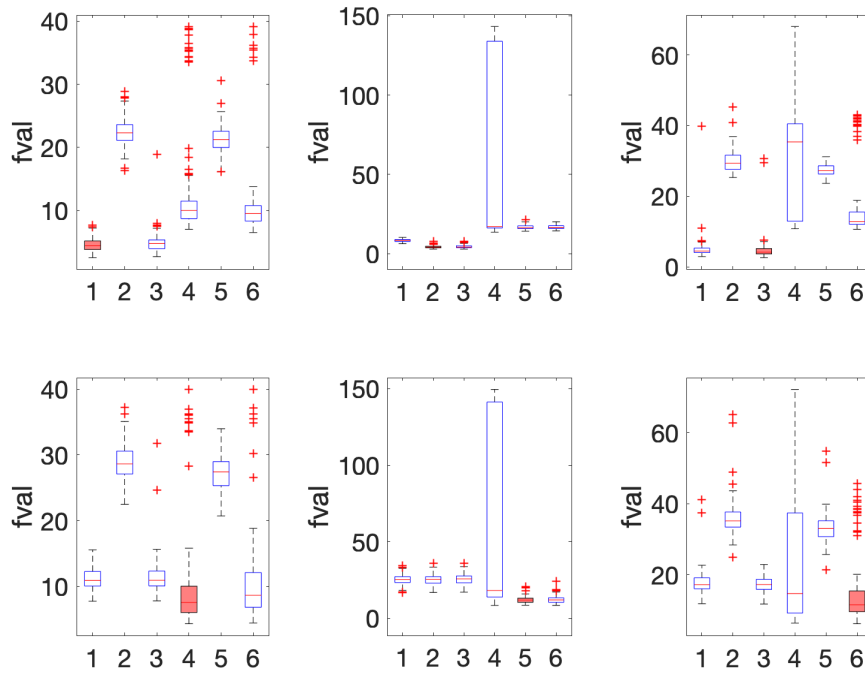

**B**

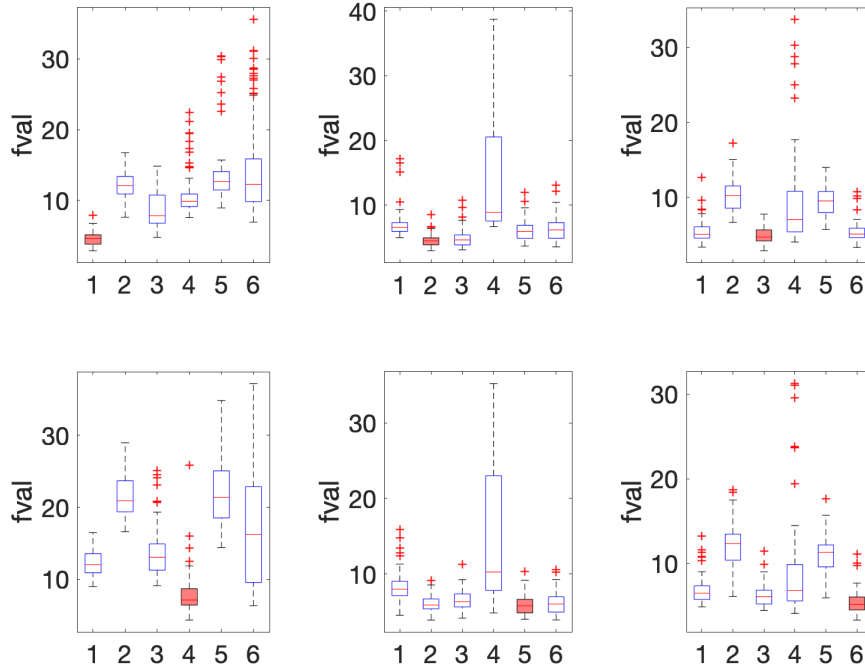

Results from minimization process. Number 1-3 refers to effects group, linear, group and linear in the variable  $\alpha_{pop}$  and 4-6 in the variable  $\mu_{pop}$ . Red boxplots correspond to the real model used to generate the data with the model. A) Normal distribution for the covariate, B) Lognormal distribution.
